# Supplementary material for: Exploring the role of monocyte chemoattractant protein-1 in fibroblast-like synovial cells in rheumatoid arthritis
Source: PeerJ. 2021 Aug 11;9:e11973. doi: 10.7717/peerj.11973 (PMC8364321; doi:10.7717/peerj.11973)
Supplement: Supplemental Information 6 [file peerj-09-11973-s006.xlsx]

## Sheet: Sheet1
Group	Absorbancy			Mean	Cell reproductive capacity =（Experimental group OD-Blank groupOD）/（Control groupOD-Blank group）
Blank group	0.124	0.117	0.108	0.116333				Human
Control group	0.712	0.673	0.676	0.687	1.04381	0.975467	0.980724
MCP-1over-expression group	0.924	0.881	0.895		1.4153	1.33995	1.36449
MCP-1 silence group	0.536	0.553	0.569		0.735397	0.765187	0.793224
Blank group	0.078	0.056	0.104	0.079333				Rat
Control group	1.124	1.037	0.975	1.04533	1.08144	0.991373	0.927191
MCP-1over-expression group	1.436	1.289	1.514		1.40442	1.25224	1.48516
MCP-1 silence group	0.872	0.684	0.586		0.820566	0.625949	0.5245
