# Supplementary material for: Exploring the role of monocyte chemoattractant protein-1 in fibroblast-like synovial cells in rheumatoid arthritis
Source: PeerJ. 2021 Aug 11;9:e11973. doi: 10.7717/peerj.11973 (PMC8364321; doi:10.7717/peerj.11973)
Supplement: Supplemental Information 7 [file peerj-09-11973-s007.xlsx]

## Sheet: 1
Actin (internal reference)	Area	Mean	IntDen	RawIntDen		Target protein/internal reference
Control group	5796	65.507	379678	373678
MCP-1over-expression group	5796	62.436	361877	361877
MCP-1 silence group	5796	63.757	369534	369534
MCP-1	Area	Mean	IntDen	RawIntDen		Target protein/internal reference			MCP-1	Control group	MCP-1over-expression group	MCP-1 silence group
Control group	3744	16.716	62583	62583	373678	0.167478				0.167478	0.305609	0.132405
MCP-1over-expression group	3744	29.539	110593	110593	361877	0.305609				0.167237	0.285949	0.135493
MCP-1 silence group	3744	13.068	48928	48928	369534	0.132405				0.164243	0.278548	0.133497
p-P38	Area	Mean	IntDen	RawIntDen		Target protein/internal reference			p-P38	Control group	MCP-1over-expression group	MCP-1 silence group
Control group	3528	31.256	110271	110271	373678	0.295096				0.295096	0.42001	0.194058
MCP-1over-expression group	3528	43.082	151992	151992	361877	0.42001				0.298418	0.416709	0.202166
MCP-1 silence group	3528	20.326	71711	71711	369534	0.194058				0.29049	0.431519	0.195612
p-PI3K	Area	Mean	IntDen	RawIntDen		Target protein/internal reference			p-PI3K	Control group	MCP-1over-expression group	MCP-1 silence group
Control group	5720	29.768	170272	170272	373678	0.455665				0.455665	0.606068	0.219687
MCP-1over-expression group	5720	38.343	219322	219322	361877	0.606068				0.440379	0.574881	0.224068
MCP-1 silence group	5720	14.193	81182	81182	369534	0.219687				0.456904	0.568173	0.226164
PI3K	Area	Mean	IntDen	RawIntDen		Target protein/internal reference			PI3K	Control group	MCP-1over-expression group	MCP-1 silence group
Control group	6200	23.403	145101	145101	373678	0.388305				0.388305	0.573242	0.210449
MCP-1over-expression group	6200	33.459	207443	207443	361877	0.573242				0.387479	0.595455	0.216111
MCP-1 silence group	6200	12.543	77768	77768	369534	0.210449				0.374069	0.574389	0.210877
CD31	Area	Mean	IntDen	RawIntDen		Target protein/internal reference
Control group	5200	38.989	202743	202743	373678	0.542561			CD31	Control group	MCP-1over-expression group	MCP-1 silence group
MCP-1over-expression group	5200	48.2565	250934	250934	361877	0.693423				0.542561	0.693423	0.26298
MCP-1 silence group	5200	18.6885	97180	97180	369534	0.26298				0.581344	0.655633	0.21784
VEGF	Area	Mean	IntDen	RawIntDen		Target protein/internal reference				0.560952	0.634697	0.211523
Control group	4940	22.09	109126	109126	373678	0.292032			VEGF	Control group	MCP-1over-expression group	MCP-1 silence group
MCP-1over-expression group	4940	28.974	143130	143130	361877	0.395521				0.292032	0.395521	0.166983
MCP-1 silence group	4940	12.491	61706	61706	369534	0.166983				0.295918	0.404046	0.170919
TNF-α	Area	Mean	IntDen	RawIntDen		Target protein/internal reference				0.282766	0.379661	0.16606
Control group	4636	32.053	148599	148599	373678	0.397666			TNF-α	Control group	MCP-1over-expression group	MCP-1 silence group
MCP-1over-expression group	4636	46.132	213870	213870	361877	0.591002				0.397666	0.591002	0.228458
MCP-1 silence group	4636	18.21	84423	84423	369534	0.228458				0.415875	0.625619	0.233939
IL-β	Area	Mean	IntDen	RawIntDen		Target protein/internal reference				0.416542	0.633848	0.231317
Control group	5192	28.001	119422	119422	373678	0.319585			IL-β	Control group	MCP-1over-expression group	MCP-1 silence group
MCP-1over-expression group	5192	31.453	163303	163303	361877	0.451267				0.319585	0.451267	0.206839
MCP-1 silence group	5192	14.721	76434	76434	369534	0.206839				0.296447	0.464795	0.214597
										0.286883	0.449876	0.208482

## Sheet: 2
Actin (internal reference)	Area	Mean	IntDen	RawIntDen		Target protein/internal reference
Control group	3840	96.458	370397	370397
MCP-1over-expression group	3840	91.313	350643	350643
MCP-1 silence group	3840	93.077	357414	357414
MCP-1	Area	Mean	IntDen	RawIntDen		Target protein/internal reference
Control group	2944	21.041	61944	61944	370397	0.167237
MCP-1over-expression group	2944	34.058	100266	100266	350643	0.285949
MCP-1 silence group	2944	16.449	48427	48427	357414	0.135493
p-P38	Area	Mean	IntDen	RawIntDen		Target protein/internal reference
Control group	4320	25.586	110533	110533	370397	0.298418
MCP-1over-expression group	4320	33.823	146116	146116	350643	0.416709
MCP-1 silence group	4320	16.726	72257	72257	357414	0.202166
p-PI3K	Area	Mean	IntDen	RawIntDen		Target protein/internal reference
Control group	4392	37.139	163115	163115	370397	0.440379
MCP-1over-expression group	4392	45.897	201578	201578	350643	0.574881
MCP-1 silence group	4392	18.234	80085	80085	357414	0.224068
PI3K	Area	Mean	IntDen	RawIntDen		Target protein/internal reference
Control group	4352	32.978	143521	143521	370397	0.387479
MCP-1over-expression group	4352	47.976	208792	208792	350643	0.595455
MCP-1 silence group	4352	17.748	77241	77241	357414	0.216111
CD31	Area	Mean	IntDen	RawIntDen		Target protein/internal reference
Control group	6240	34.508	215328	215328	370397	0.581344
MCP-1over-expression group	6240	36.842	229893	229893	350643	0.655633
MCP-1 silence group	6240	12.477	77859	77859	357414	0.21784
VEGF	Area	Mean	IntDen	RawIntDen		Target protein/internal reference
Control group	5520	19.856	109607	109607	370397	0.295918
MCP-1over-expression group	5520	25.666	141676	141676	350643	0.404046
MCP-1 silence group	5520	11.067	61089	61089	357414	0.170919
TNF-α	Area	Mean	IntDen	RawIntDen		Target protein/internal reference
Control group	4320	35.657	154039	154039	370397	0.415875
MCP-1over-expression group	4320	50.78	219369	219369	350643	0.625619
MCP-1 silence group	4320	19.355	83613	83613	357414	0.233939
IL-β	Area	Mean	IntDen	RawIntDen		Target protein/internal reference
Control group	4680	23.462	109803	109803	370397	0.296447
MCP-1over-expression group	4680	34.824	162977	162977	350643	0.464795
MCP-1 silence group	4680	16.389	76700	76700	357414	0.214597

## Sheet: 3
Actin (internal reference)	Area	Mean	IntDen	RawIntDen		Target protein/internal reference
Control group	5120	74.018	378970	378970
MCP-1over-expression group	5120	70.423	360566	360566
MCP-1 silence group	5120	71.113	364098	364098
MCP-1	Area	Mean	IntDen	RawIntDen		Target protein/internal reference
Control group	3264	19.07	62243	62243	378970	0.164243
MCP-1over-expression group	3264	30.771	100435	100435	360566	0.278548
MCP-1 silence group	3264	14.892	48606	48606	364098	0.133497
p-P38	Area	Mean	IntDen	RawIntDen		Target protein/internal reference
Control group	3456	31.854	110087	110087	378970	0.29049
MCP-1over-expression group	3456	45.026	155591	155591	360566	0.431519
MCP-1 silence group	3456	20.608	71222	71222	364098	0.195612
p-PI3K	Area	Mean	IntDen	RawIntDen		Target protein/internal reference
Control group	7772	22.279	173153	173153	378970	0.456904
MCP-1over-expression group	7772	26.359	204864	204864	360566	0.568173
MCP-1 silence group	7772	10.595	82346	82346	364098	0.226164
PI3K	Area	Mean	IntDen	RawIntDen		Target protein/internal reference
Control group	4032	35.159	141761	141761	378970	0.374069
MCP-1over-expression group	4032	51.365	207105	207105	360566	0.574389
MCP-1 silence group	4032	19.043	76780	76780	364098	0.210877
CD31	Area	Mean	IntDen	RawIntDen		Target protein/internal reference
Control group	4752	44.736	212584	212584	378970	0.560952
MCP-1over-expression group	4752	48.159	228850	228850	360566	0.634697
MCP-1 silence group	4752	16.207	77015	77015	364098	0.211523
VEGF	Area	Mean	IntDen	RawIntDen		Target protein/internal reference
Control group	4080	26.265	107160	107160	378970	0.282766
MCP-1over-expression group	4080	33.552	136893	136893	360566	0.379661
MCP-1 silence group	4080	14.819	60462	60462	364098	0.16606
TNF-α	Area	Mean	IntDen	RawIntDen		Target protein/internal reference
Control group	5520	28.597	157857	157857	378970	0.416542
MCP-1over-expression group	5520	41.403	228544	228544	360566	0.633848
MCP-1 silence group	5520	15.258	84222	84222	364098	0.231317
IL-β	Area	Mean	IntDen	RawIntDen		Target protein/internal reference
Control group	3968	27.399	108720	108720	378970	0.286883
MCP-1over-expression group	3968	40.88	162210	162210	360566	0.449876
MCP-1 silence group	3968	19.13	75908	75908	364098	0.208482
