# Supplementary material for: Exploring the role of monocyte chemoattractant protein-1 in fibroblast-like synovial cells in rheumatoid arthritis
Source: PeerJ. 2021 Aug 11;9:e11973. doi: 10.7717/peerj.11973 (PMC8364321; doi:10.7717/peerj.11973)
Supplement: Supplemental Information 8 [file peerj-09-11973-s008.xlsx]

## Sheet: 1
Actin (internal reference)	Area	Mean	IntDen	RawIntDen		Target protein/internal reference
Control group	5888	108.457	638594	638594
MCP-1over-expression group	5888	103.966	612149	612149
MCP-1 silence group	5888	100.442	591403	591403					Control group	MCP-1over-expression group	MCP-1 silence group
MCP-1	Area	Mean	IntDen	RawIntDen		Target protein/internal reference		MCP-1	0.169842	0.222413	0.100092
Control group	5104	21.25	108460	108460	638594	0.169842			0.17253	0.223561	0.0992563
MCP-1over-expression group	5104	26.675	136150	136150	612149	0.222413			0.16481	0.213124	0.0962519
MCP-1 silence group	5104	11.598	59195	59195	591403	0.100092		p-P38	Control group	MCP-1over-expression group	MCP-1 silence group
p-P38	Area	Mean	IntDen	RawIntDen		Target protein/internal reference			0.465584	0.508437	0.257007
Control group	3780	78.656	297319	297319	638594	0.465584			0.465423	0.521444	0.239767
MCP-1over-expression group	3780	82.339	311239	311239	612149	0.508437			0.467268	0.499671	0.238891
MCP-1 silence group	3780	40.21	151995	151995	591403	0.257007		p-PI3K	Control group	MCP-1over-expression group	MCP-1 silence group
p-PI3K	Area	Mean	IntDen	RawIntDen		Target protein/internal reference			0.145377	0.178118	0.0952582
Control group	3944	23.539	92837	92837	638594	0.145377			0.144951	0.16749	0.090592
MCP-1over-expression group	3944	27.646	109035	109035	612149	0.178118			0.194824	0.233915	0.151255
MCP-1 silence group	3944	14.284	56336	56336	591403	0.0952582		PI3K	Control group	MCP-1over-expression group	MCP-1 silence group
PI3K	Area	Mean	IntDen	RawIntDen		Target protein/internal reference			0.200539	0.245889	0.15584
Control group	4420	28.974	128063	128063	638594	0.200539			0.203506	0.248536	0.156119
MCP-1over-expression group	4420	34.055	150521	150521	612149	0.245889			0.154858	0.174888	0.104883
MCP-1 silence group	4420	20.852	92164	92164	591403	0.15584		CD31	Control group	MCP-1over-expression group	MCP-1 silence group
CD31	Area	Mean	IntDen	RawIntDen		Target protein/internal reference			0.174522	0.256557	0.126349
Control group	4664	23.896	111449	111449	638594	0.174522			0.169618	0.250689	0.116183
MCP-1over-expression group	4664	33.673	157051	157051	612149	0.256557			0.167802	0.243758	0.115244
MCP-1 silence group	4664	16.021	74723	74723	591403	0.126349		VEGF	Control group	MCP-1over-expression group	MCP-1 silence group
VEGF	Area	Mean	IntDen	RawIntDen		Target protein/internal reference			0.126354	0.18183	0.0927117
Control group	3572	22.589	80689	80689	638594	0.126354			0.126824	0.180497	0.0993738
MCP-1over-expression group	3572	31.161	111307	111307	612149	0.18183			0.123636	0.174943	0.0981942
MCP-1 silence group	3572	15.35	54830	54830	591403	0.0927117		TNF-α	Control group	MCP-1over-expression group	MCP-1 silence group
TNF-α	Area	Mean	IntDen	RawIntDen		Target protein/internal reference			0.288512	0.316229	0.204363
Control group	4028	45.74	184242	184242	638594	0.288512			0.281117	0.315148	0.193968
MCP-1over-expression group	4028	48.058	193579	193579	612149	0.316229			0.284139	0.308894	0.198688
MCP-1 silence group	4028	30.005	120861	120861	591403	0.204363		IL-β	Control group	MCP-1over-expression group	MCP-1 silence group
IL-β	Area	Mean	IntDen	RawIntDen		Target protein/internal reference			0.6062	0.736103	0.413544
Control group	4704	82.295	387116	387116	638594	0.6062			0.623318	0.753868	0.429295
MCP-1over-expression group	4704	95.792	450605	450605	612149	0.736103			0.581995	0.678419	0.396477
MCP-1 silence group	4704	51.992	244571	244571	591403	0.413544

## Sheet: 2
Actin (internal reference)	Area	Mean	IntDen	RawIntDen		Target protein/internal reference
Control group	5016	124.756	625775	625775
MCP-1over-expression group	5016	120.824	606054	606054
MCP-1 silence group	5016	117.073	587237	587237
MCP-1	Area	Mean	IntDen	RawIntDen		Target protein/internal reference
Control group	4392	24.582	107965	107965	625775	0.17253
MCP-1over-expression group	4392	30.849	135490	135490	606054	0.223561
MCP-1 silence group	4392	13.271	58287	58287	587237	0.0992563
p-P38	Area	Mean	IntDen	RawIntDen		Target protein/internal reference
Control group	3840	75.846	291250	291250	625775	0.465423
MCP-1over-expression group	3840	82.298	316023	316023	606054	0.521444
MCP-1 silence group	3840	36.667	140800	140800	587237	0.239767
p-PI3K	Area	Mean	IntDen	RawIntDen		Target protein/internal reference
Control group	3952	22.952	90707	90707	625775	0.144951
MCP-1over-expression group	3952	25.685	101508	101508	606054	0.16749
MCP-1 silence group	3952	13.461	53199	53199	587237	0.090592
PI3K	Area	Mean	IntDen	RawIntDen		Target protein/internal reference
Control group	4464	28.528	127349	127349	625775	0.203506
MCP-1over-expression group	4464	33.742	150626	150626	606054	0.248536
MCP-1 silence group	4464	20.537	91679	91679	587237	0.156119
CD31	Area	Mean	IntDen	RawIntDen		Target protein/internal reference
Control group	4560	23.277	106143	106143	625775	0.169618
MCP-1over-expression group	4560	33.318	151931	151931	606054	0.250689
MCP-1 silence group	4560	14.962	68227	68227	587237	0.116183
VEGF	Area	Mean	IntDen	RawIntDen		Target protein/internal reference
Control group	2496	31.796	79363	79363	625775	0.126824
MCP-1over-expression group	2496	43.827	109391	109391	606054	0.180497
MCP-1 silence group	2496	23.38	58356	58356	587237	0.0993738
TNF-α	Area	Mean	IntDen	RawIntDen		Target protein/internal reference
Control group	2640	66.635	175916	175916	625775	0.281117
MCP-1over-expression group	2640	72.347	190997	190997	606054	0.315148
MCP-1 silence group	2640	43.146	113905	113905	587237	0.193968
IL-β	Area	Mean	IntDen	RawIntDen		Target protein/internal reference
Control group	4788	81.466	390057	390057	625775	0.623318
MCP-1over-expression group	4788	95.423	456885	456885	606054	0.753868
MCP-1 silence group	4788	52.652	252098	252098	587237	0.429295

## Sheet: 3
Actin (internal reference)	Area	Mean	IntDen	RawIntDen		Target protein/internal reference
Control group	5984	108.87	651476	651476
MCP-1over-expression group	5984	106.141	635286	635286
MCP-1 silence group	5984	101.179	605453	605453
MCP-1	Area	Mean	IntDen	RawIntDen		Target protein/internal reference
Control group	4248	25.275	107370	107370	651476	0.16481
MCP-1over-expression group	4248	31.873	135395	135395	635286	0.213124
MCP-1 silence group	4248	13.718	58276	58276	605453	0.0962519
p-P38	Area	Mean	IntDen	RawIntDen		Target protein/internal reference
Control group	5800	52.485	304414	304414	651476	0.467268
MCP-1over-expression group	5800	54.73	317434	317434	635286	0.499671
MCP-1 silence group	5800	24.937	144637	144637	605453	0.238891
p-PI3K	Area	Mean	IntDen	RawIntDen		Target protein/internal reference
Control group	4636	27.378	126923	126923	651476	0.194824
MCP-1over-expression group	4636	32.054	148603	148603	635286	0.233915
MCP-1 silence group	4636	19.754	91578	91578	605453	0.151255
PI3K	Area	Mean	IntDen	RawIntDen		Target protein/internal reference
Control group	6720	15.013	100886	100886	651476	0.154858
MCP-1over-expression group	6720	16.533	111104	111104	635286	0.174888
MCP-1 silence group	6720	9.45	63502	63502	605453	0.104883
CD31	Area	Mean	IntDen	RawIntDen		Target protein/internal reference
Control group	3540	30.881	109319	109319	651476	0.167802
MCP-1over-expression group	3540	43.745	154856	154856	635286	0.243758
MCP-1 silence group	3540	19.71	69775	69775	605453	0.115244
VEGF	Area	Mean	IntDen	RawIntDen		Target protein/internal reference
Control group	3420	23.551	80546	80546	651476	0.123636
MCP-1over-expression group	3420	32.497	111139	111139	635286	0.174943
MCP-1 silence group	3420	17.384	59452	59452	605453	0.0981942
TNF-α	Area	Mean	IntDen	RawIntDen		Target protein/internal reference
Control group	4312	42.929	185110	185110	651476	0.284139
MCP-1over-expression group	4312	45.509	196236	196236	635286	0.308894
MCP-1 silence group	4312	27.898	120296	120296	605453	0.198688
IL-β	Area	Mean	IntDen	RawIntDen		Target protein/internal reference
Control group	3584	105.791	379156	379156	651476	0.581995
MCP-1over-expression group	3584	120.254	430990	430990	635286	0.678419
MCP-1 silence group	3584	66.978	240048	240048	605453	0.396477
