# Supplementary material for: Exploring the role of monocyte chemoattractant protein-1 in fibroblast-like synovial cells in rheumatoid arthritis
Source: PeerJ. 2021 Aug 11;9:e11973. doi: 10.7717/peerj.11973 (PMC8364321; doi:10.7717/peerj.11973)
Supplement: Supplemental Information 9 [file peerj-09-11973-s009.xlsx]

## Sheet: Figure 9A
Normal control group	Sample name	2-△△ct	Patient group	Sample name	2-△△ct
	D-1-1TX	0.998152		1-1TX	1.23067
	D-2-1TX	0.93676		2-1	1.5138
	D-3-1TX	1.08853		3-1TX	1.33028
	D-4-1TX	1.08556		5-1	1.70805
	D-5-1TX	1.0724		7-1	1.43077
	D-6-1TX	0.897533		8-1	1.63081
	D-7-1	0.98416		9-1	2.09525
	D-8-1	0.911366		10-1TX	1.60865
	D-9-1TX	0.97549		11-1TX	1.42296
	D-10-1	1.09343		12-1TX	1.53888
	D11-1TX	1.06273		13-1TX	1.74088
	D12-1TX	0.881325		14-1TX	1.89744
	D13-1TX	1.01258		15-1	1.4102
Mean		1			1.58143
SD		0.0766559			0.237721

## Sheet: Figure 9B-E
Normal control group	Sample name	Sample data analysis (mg/L)	Patient group	Sample name	Sample data analysis (mg/L)	CRP
	D-2-2TX	2.26403		1-2TX	3.86687
	D3-2TX	1.62168		3-2TX	3.569
	D-4-2TX	2.62877		7-2	2.4383
	D-6-2TX	2.56798		9-2	2.76657
	D-8-2	3.75745		11-2TX	3.43526
	D11-2TX	1.77771		12-2	3.29544
	D12-2TX	1.54671		14-2TX	3.30152
	D13-2TX	2.57609		15-2TX	3.89524
Mean		2.34255			3.32102
SD		0.723824			0.505664
Normal control group	Sample name	Sample data analysis (pg/mL)	Patient group	Sample name	Sample data analysis (pg/mL)	ER
	D-2-2TX	10.2769		1-2TX	63.2513
	D3-2TX	12.7385		3-2TX	51.5077
	D-4-2TX	21.6103		7-2	67.7128
	D-6-2TX	31.559		9-2	91.559
	D-8-2	48.7897		11-2TX	103.046
	D11-2TX	39.559		12-2	56.1744
	D12-2TX	49.3538		14-2TX	105.764
	D13-2TX	35.8667		15-2TX	80.6872
Mean		31.2192			77.4628
SD		15.1247			21.005
Normal control group	Sample name	Sample data analysis (pg/mL)	Patient group	Sample name	Sample data analysis (pg/mL)	MCP-1
	D-2-2TX	92.1707		1-2TX	47.6992
	D3-2TX	110.138		3-2TX	56.7236
	D-4-2TX	87.6992		7-2	102.821
	D-6-2TX	64.7724		9-2	100.789
	D-8-2	68.5122		11-2TX	87.5366
	D11-2TX	122.333		12-2	55.1789
	D12-2TX	109.894		14-2TX	89.5691
	D13-2TX	95.1789		15-2TX	68.0244
Mean		93.8374			76.0427
SD		20.2271			21.7804
Normal control group	Sample name	Sample data analysis (ng/L)	Patient group	Sample name	Sample data analysis (ng/L)	PTX3
	D-2-2TX	2.65287		1-2TX	0.671634
	D3-2TX	0.936534		3-2TX	1.52704
	D-4-2TX	2.54249		7-2	0.55574
	D-6-2TX	1.51049		9-2	4.0436
	D-8-2	3.12196		11-2TX	0.947572
	D11-2TX	3.96634		12-2	0.533664
	D12-2TX	3.44205		14-2TX	0.853753
	D13-2TX	1.91887		15-2TX	0.953091
Mean		2.51145			1.26076
SD		1.01488			1.1678
