# Supplementary material for: Exploring the role of monocyte chemoattractant protein-1 in fibroblast-like synovial cells in rheumatoid arthritis
Source: PeerJ. 2021 Aug 11;9:e11973. doi: 10.7717/peerj.11973 (PMC8364321; doi:10.7717/peerj.11973)
Supplement: Supplemental Information 10 [file peerj-09-11973-s010.xlsx]

## Sheet: Sheet1
Sample	TJC	SJC	ESR	CRP	GH	MCP-1	DAS28	DAS28-MCP1	DAS28-CRP
Rheumatoid arthritis patient-1	10	10	51	21.5	3	1.23067	4.23172	2.77926	3.89485
Rheumatoid arthritis patient-2	13	13	99	821	5	1.5138	4.89076	3.26037	5.71577
Rheumatoid arthritis patient-3	6	6	97	168	4	1.33028	3.89771	2.22487	4.11192
Rheumatoid arthritis patient-4	4	2	24	2.9	2	NA	2.78342	NA	1.95922
Rheumatoid arthritis patient-5	10	10	8	3.1	2	1.70805	3.4953	2.8931	3.12556
Rheumatoid arthritis patient-6	8	8	NA	4.5	1	NA	NA	NA	2.97647
Rheumatoid arthritis patient-7	10	10	83	19.8	2	1.43077	4.40766	2.82402	3.84873
Rheumatoid arthritis patient-8	8	8	20	2.2	1	1.63081	3.55821	2.58062	2.69738
Rheumatoid arthritis patient-9	6	6	107	79.8	3	2.09525	3.92198	2.38804	3.80759
Rheumatoid arthritis patient-10	4	4	36	3.1	2	1.60865	3.10557	1.8934	2.14925
Rheumatoid arthritis patient-11	8	8	106	80.1	3	1.42296	4.23662	2.55545	4.12736
Rheumatoid arthritis patient-12	2	2	4	3.1	1	1.53889	1.74259	1.37005	1.64319
Rheumatoid arthritis patient-13	6	6	56	10.4	2	1.74088	3.65546	2.30179	2.99888
Rheumatoid arthritis patient-14	10	10	50	7.3	3	1.89744	4.224	2.94811	3.47358
Rheumatoid arthritis patient-15	8	8	49	32	3	1.4102	3.93569	2.55193	3.76952
Normal-1	1	1	NA	4.9	1	0.998152	NA	0.853279	1.4738
Normal-2	1	1	29	22.8	1	0.93676	2.16724	0.828522	2.07344
Normal-3	1	1	NA	13.4	1	1.08853	NA	0.887082	1.86615
Normal-4	1	1	NA	3.1	1	1.08556	NA	0.886016	1.29525
Normal-5	1	1	NA	8.9	1	1.0724	NA	0.881259	1.70656
Normal-6	1	1	21	25.2	1	0.897533	2.04136	0.811839	2.11247
Normal-7	1	1	6	2.7	1	0.98416	1.55279	0.847773	1.24137
Normal-8	1	1	48	95.1	1	0.911366	2.36377	0.817804	2.63042
Normal-9	1	1	2	2.4	1	0.97549	1.12433	0.844322	1.19543
Normal-10	1	1	23	0.9	1	1.09343	2.07684	0.888834	0.812909
Normal-11	1	1	14	21	1	1.06273	1.88323	0.877727	2.04136
Normal-12	1	1	58	29.2	1	0.881325	2.43757	0.804732	2.16993
Normal-13	1	1	25	5.3	1	1.01258	2.10936	0.858875	1.50441
